# Supplementary material for: DOPA pheomelanin is increased in nigral neuromelanin of Parkinson’s disease and it exacerbates alpha-synuclein neurotoxicity
Source: bioRxiv or medRxiv preprint supplement (doi:10.1101/2022.06.30.22277063), 2022-07-02
Supplement: Supplementary file [file media-1.pdf]

## Supplementary materials

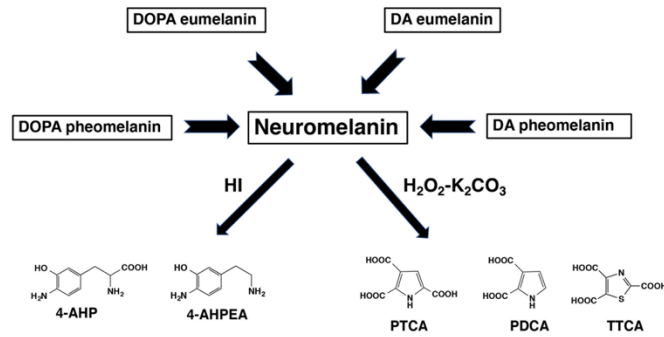

**Supplementary Figure 1: Chemical degradation of pheomelanin and eumelanin in the SN.** HI reduction produces 4-AHP and 4-AHPEA, markers for DOPA pheomelanin and DA pheomelanin, respectively. H<sub>2</sub>O<sub>2</sub>-K<sub>2</sub>CO<sub>3</sub> oxidation (AHPO) produces PTCA, a marker for DOPA eumelanin, PDCA, a marker for DA eumelanin, and TTCA, a marker for DA pheomelanin.
